# Supplementary material for: Nanotextured alpha Ni(ii)–Co(ii) hydroxides as supercapacitive active phases
Source: Royal Society of Chemistry journal article supplement (doi:10.1039/c6ra27839f), 2017-01-01
Supplement: c6ra27839f1.pdf [file c6ra27839f1.pdf]

Supporting Information

Nanotextured alpha Ni(II)-Co(II) hydroxides as supercapacitive active phases

Nicolás Arencibia,<sup>a</sup> Víctor Oestreicher,<sup>a</sup> Federico A. Viva,<sup>b</sup> Matías Jobbágy\*<sup>a,c</sup>

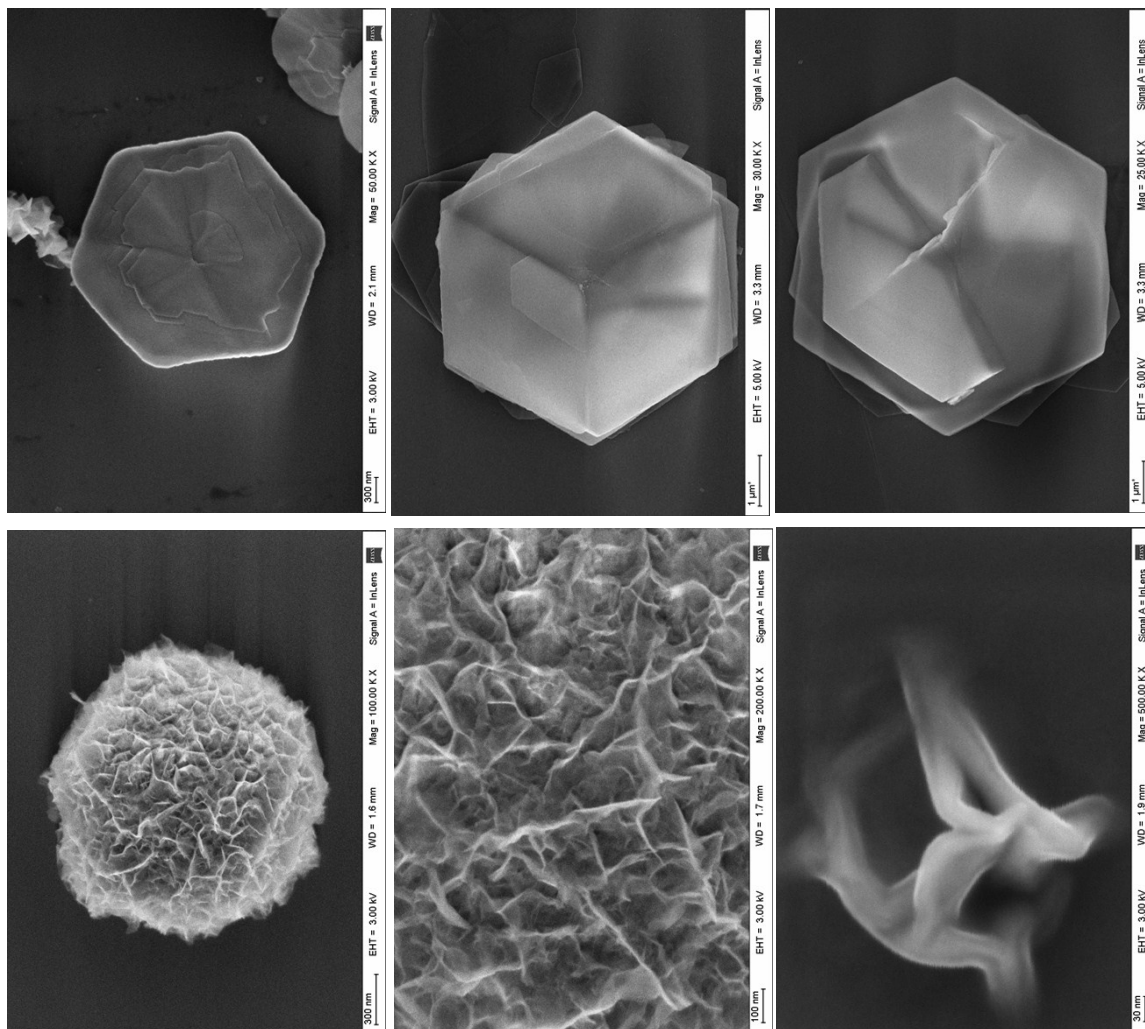

**Figure S1.** FESEM images of Ni0 (upper row) and Ni100 (lower row) samples.

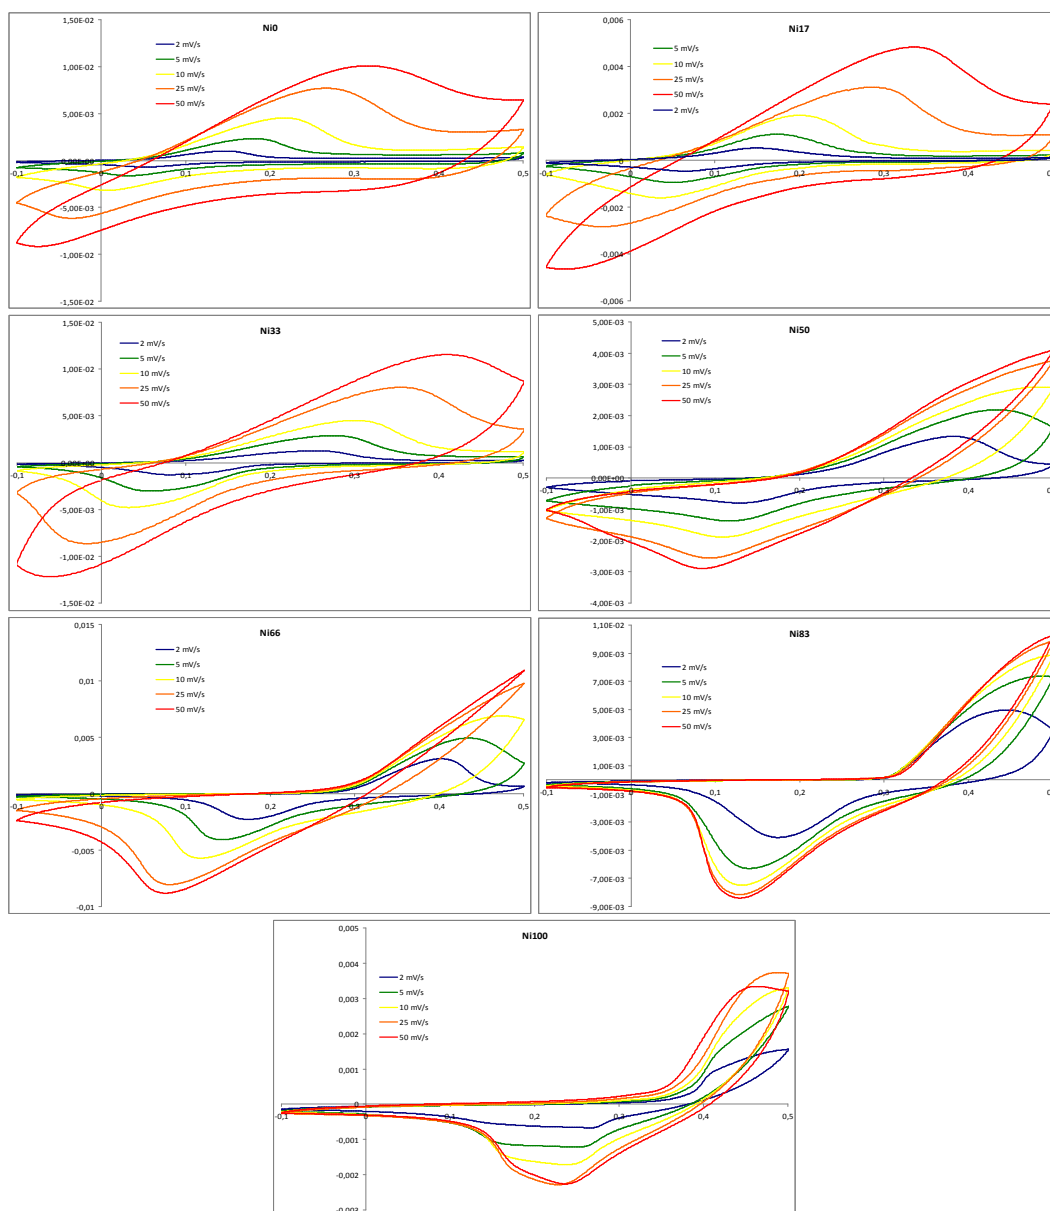

**Figure S2.** Cyclic voltammetry (CV) curves: current (mA/g) vs. applied potential (V vs. Ag/AgCl electrode) recorded at increasing potential ramps.

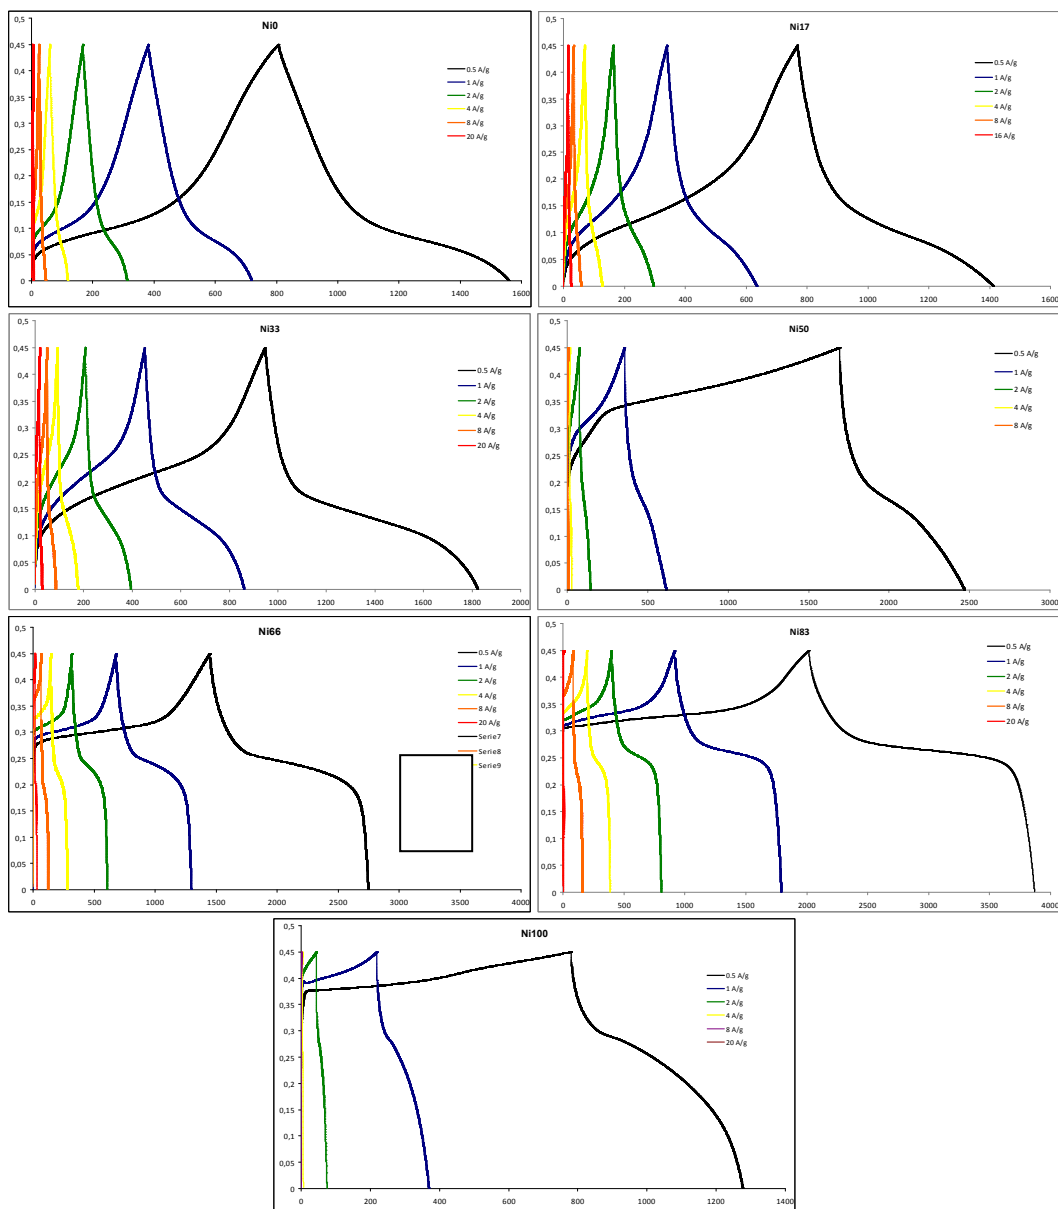

**Figure S3.** Galvanostatic charge/discharge (CD) curves: potential (V vs. Ag/AgCl electrode) vs. time, recorded at increasing currents.
